# Supplementary material for: Directed biosynthesis through biohalogenation of secondary metabolites of the marine-derived fungus Aspergillus unguis
Source: Royal Society of Chemistry journal article supplement (doi:10.1039/c2ra23021f), 2012-11-23

## Supplementary Information

### **Directed biosynthesis through biohalogenation of secondary metabolites of the marine-derived fungus *Aspergillus unguis***

Sanya Sureram, Chatchai Kesornpun, Chulabhorn Mahidol, Somsak Ruchirawat, and Prasat Kittakoop

#### **Reagents**

Commercial PDB powder was purchased from HiMedia Laboratories, India. Potassium bromide (KBr) was from Sigma-Aldrich (France), while potassium iodide (KI) and potassium fluoride (KF) were from Carlo Erba (France) and BDH Laboratory Supplies (England). Water with a resistivity of 18.2 MΩ.cm used for media preparation was obtained from a Milli-Q water purification system (Millipore, USA). Sephadex LH-20 and silica gel for column chromatography were purchased from GE Healthcare (Sweden) and Merck (Germany), respectively.

**<sup>1</sup>H and <sup>13</sup>C NMR spectra of compounds 1-5, and 9.**

Fig. S1.  $^1\text{H}$  NMR spectrum (acetone- $\text{d}_6$ ) of aspergillusidone D (**1**)

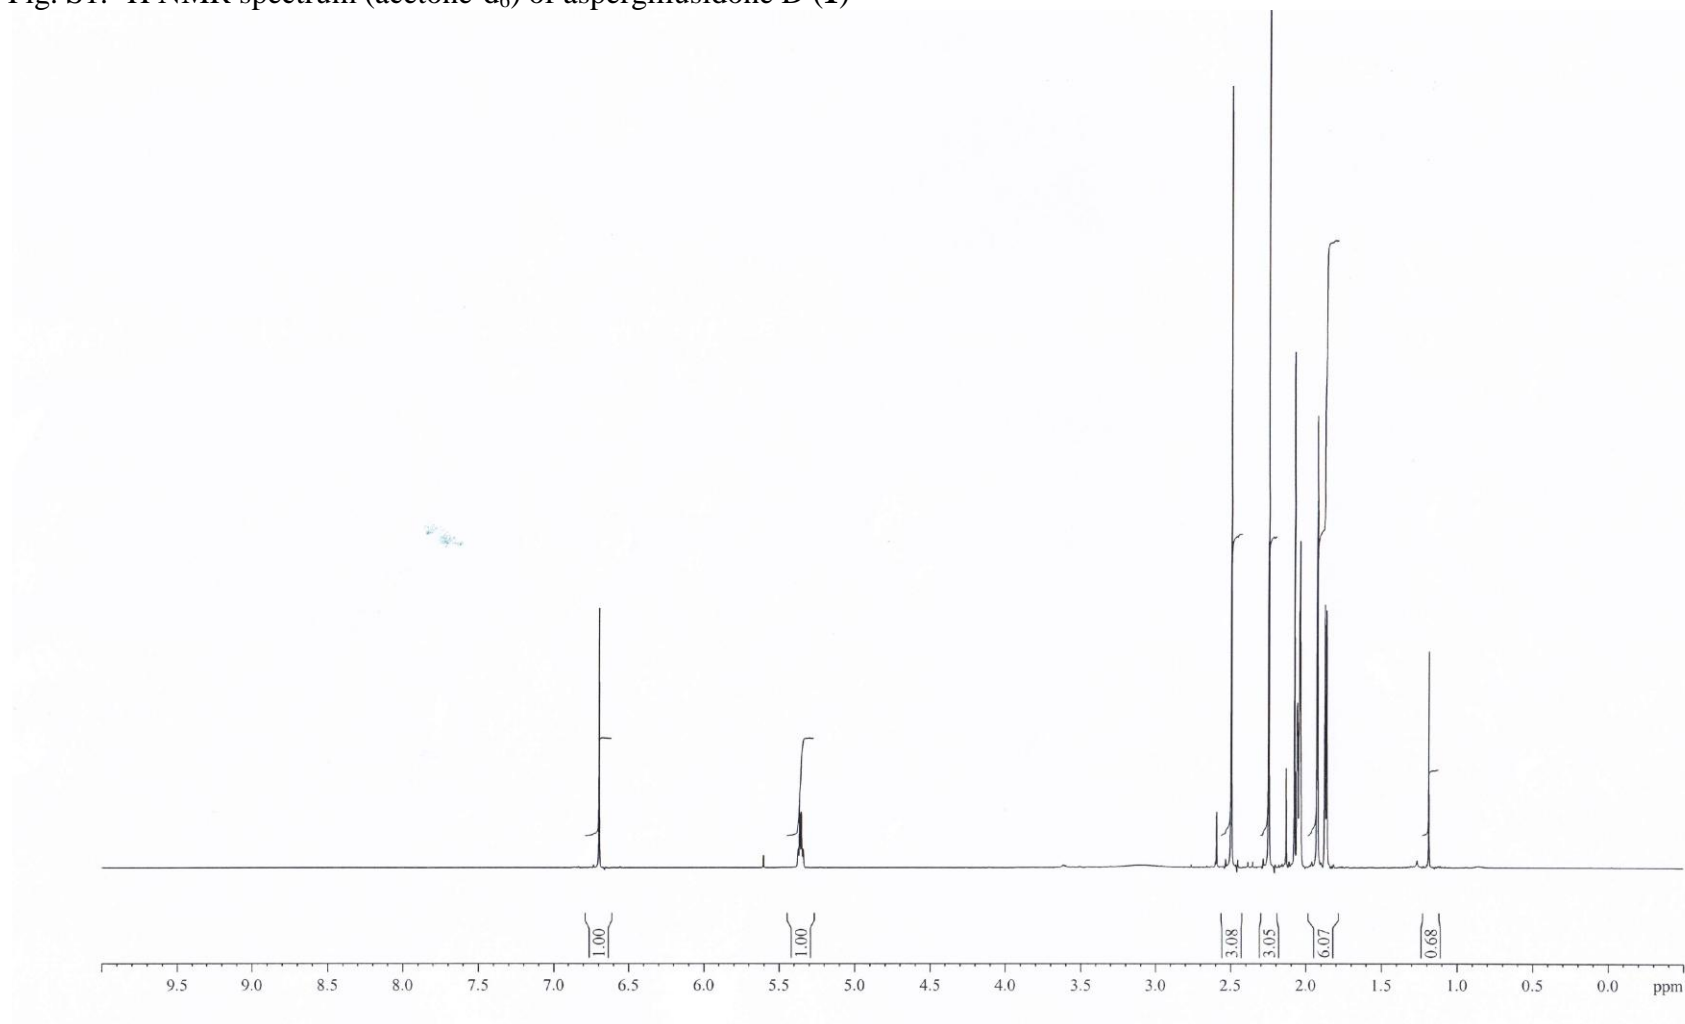

Fig. S2. <sup>13</sup>C NMR spectrum (acetone-d<sub>6</sub>) of aspergillusidone D (**1**)

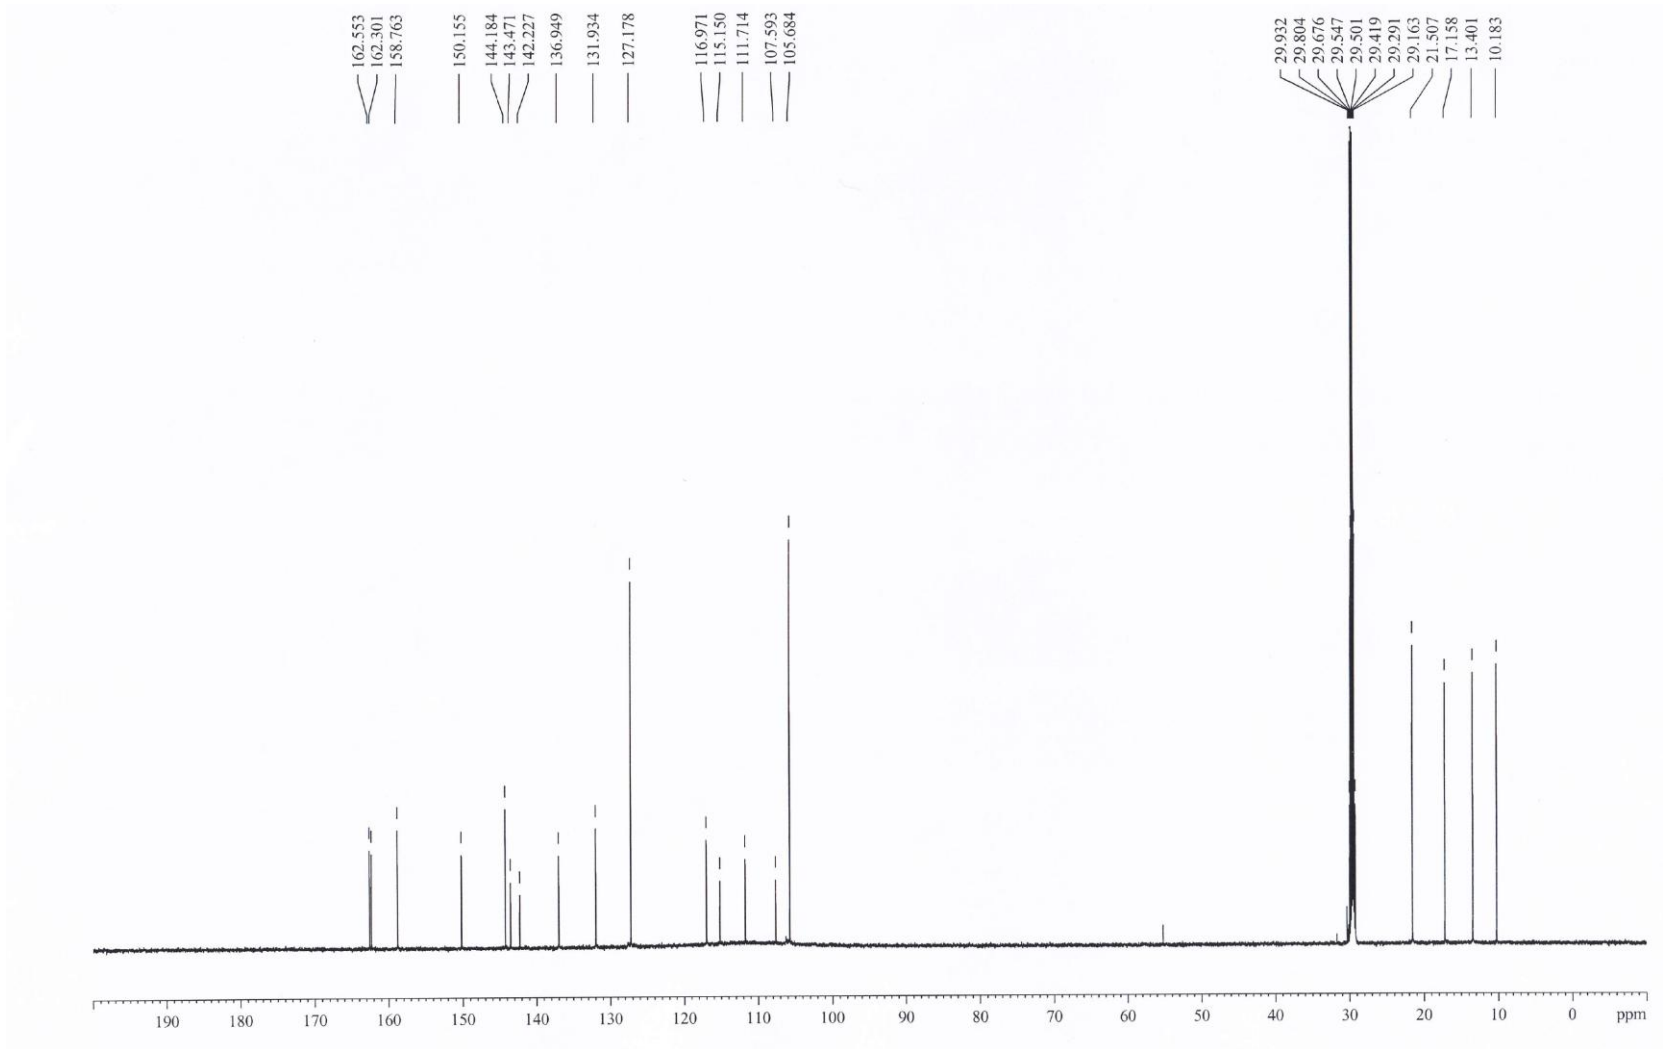

Fig. S3.  $^1\text{H}$  NMR spectrum (acetone- $\text{d}_6$ ) of aspergillusidone E (**2**)

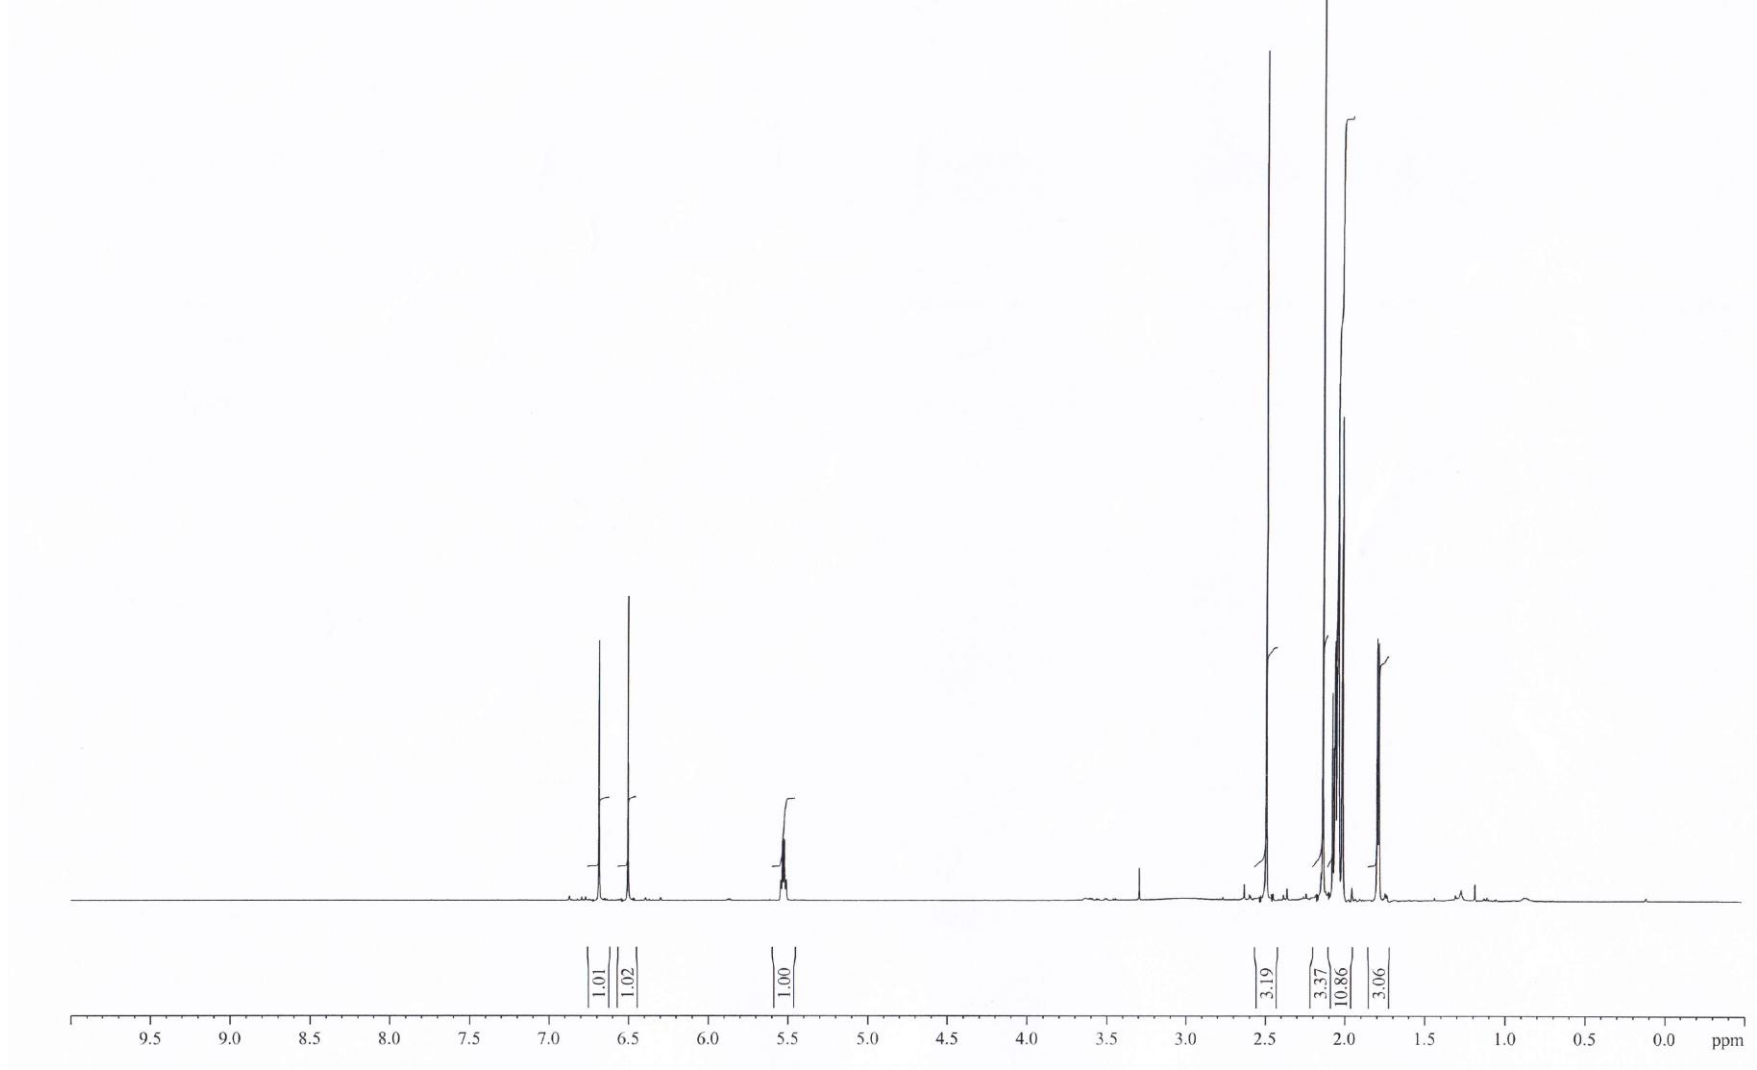

Fig. S4.  $^{13}\text{C}$  NMR spectrum (acetone- $\text{d}_6$ ) of aspergillusidone E (**2**)

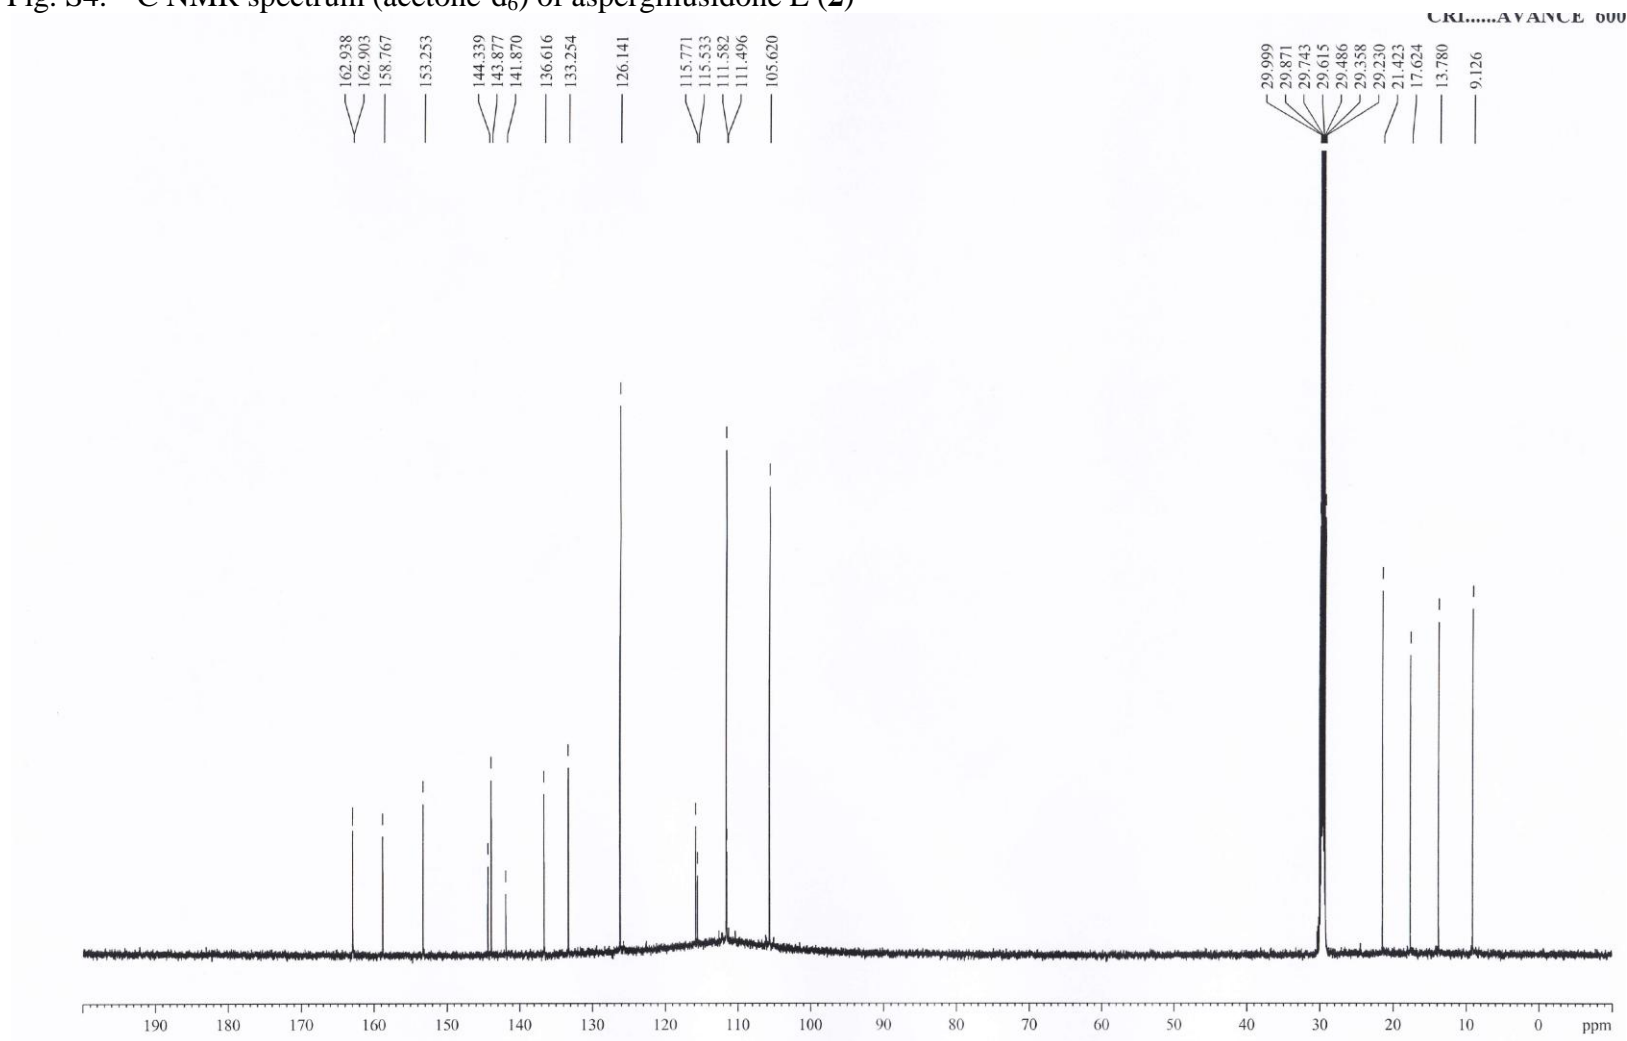

Fig. S5.  $^1\text{H}$  NMR spectrum (acetone- $\text{d}_6$ ) of aspergillusidone F (**3**)

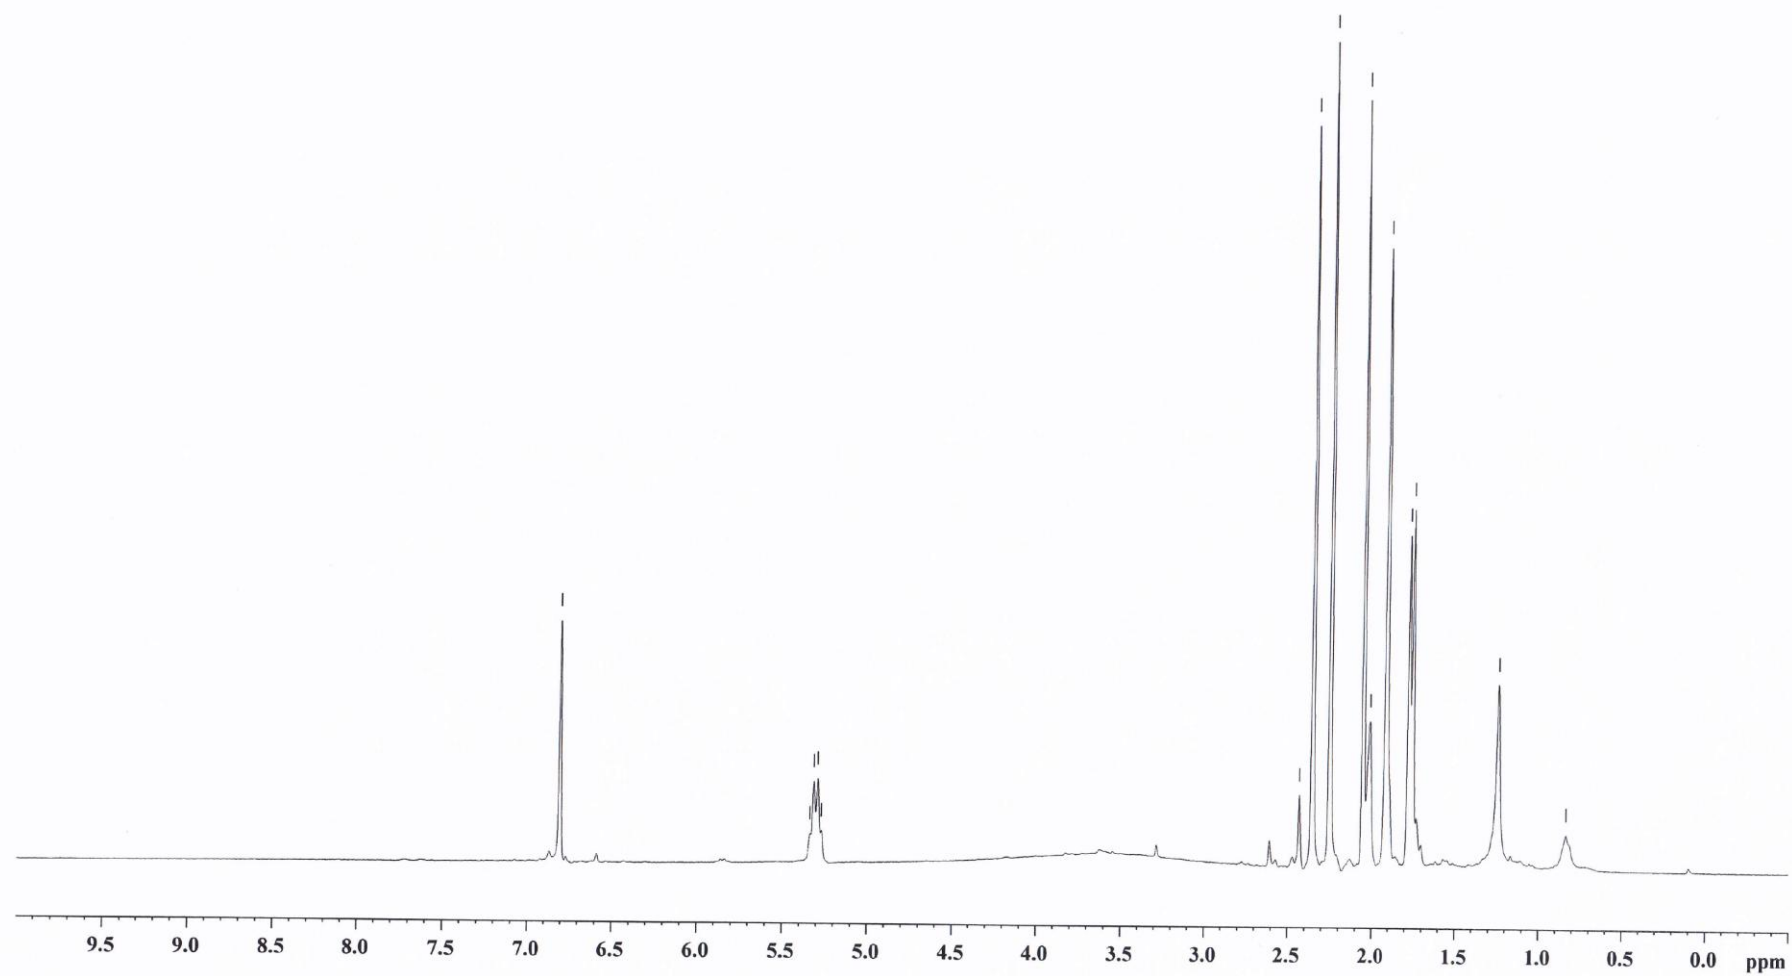

Fig. S6. <sup>13</sup>C NMR spectrum (acetone-d<sub>6</sub>) of aspergillusidone F (**3**)

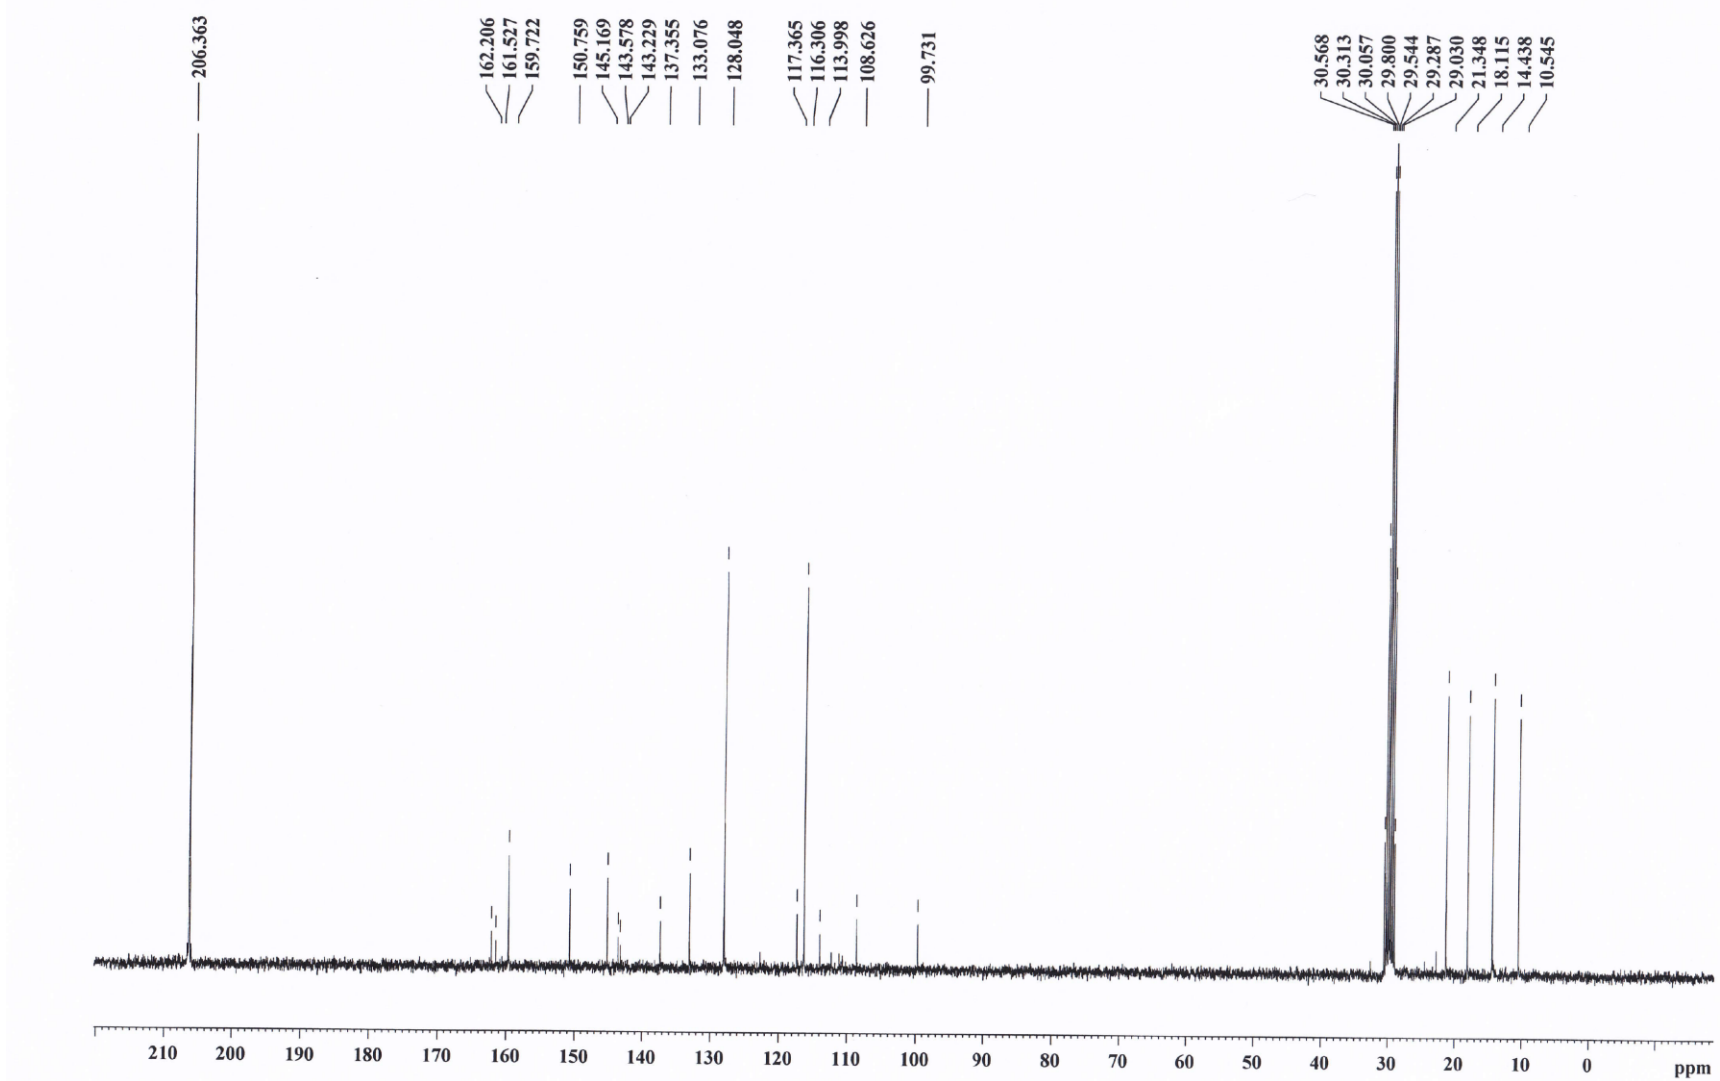

Fig. S7.  $^1\text{H}$  NMR spectrum (acetone- $\text{d}_6$ ) of aspergillusphenol A (**4**)

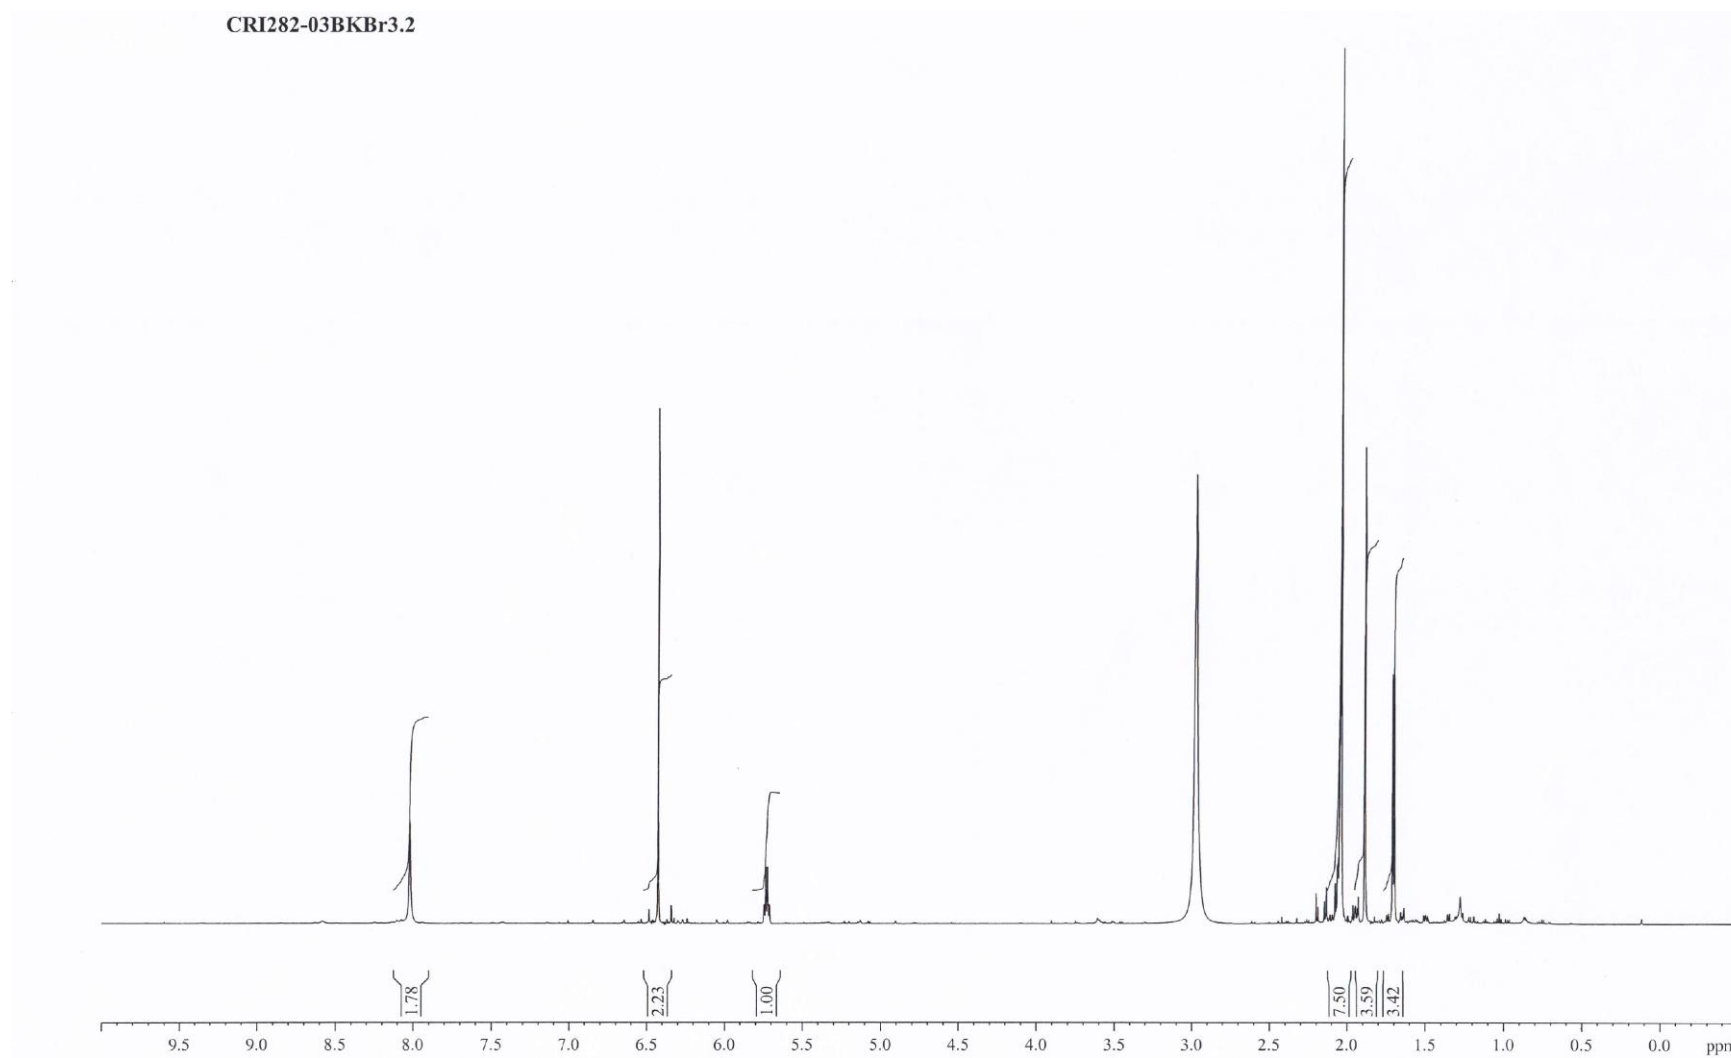

Fig. S8.  $^{13}\text{C}$  NMR spectrum (acetone- $\text{d}_6$ ) of aspergillusphenol A (**4**)

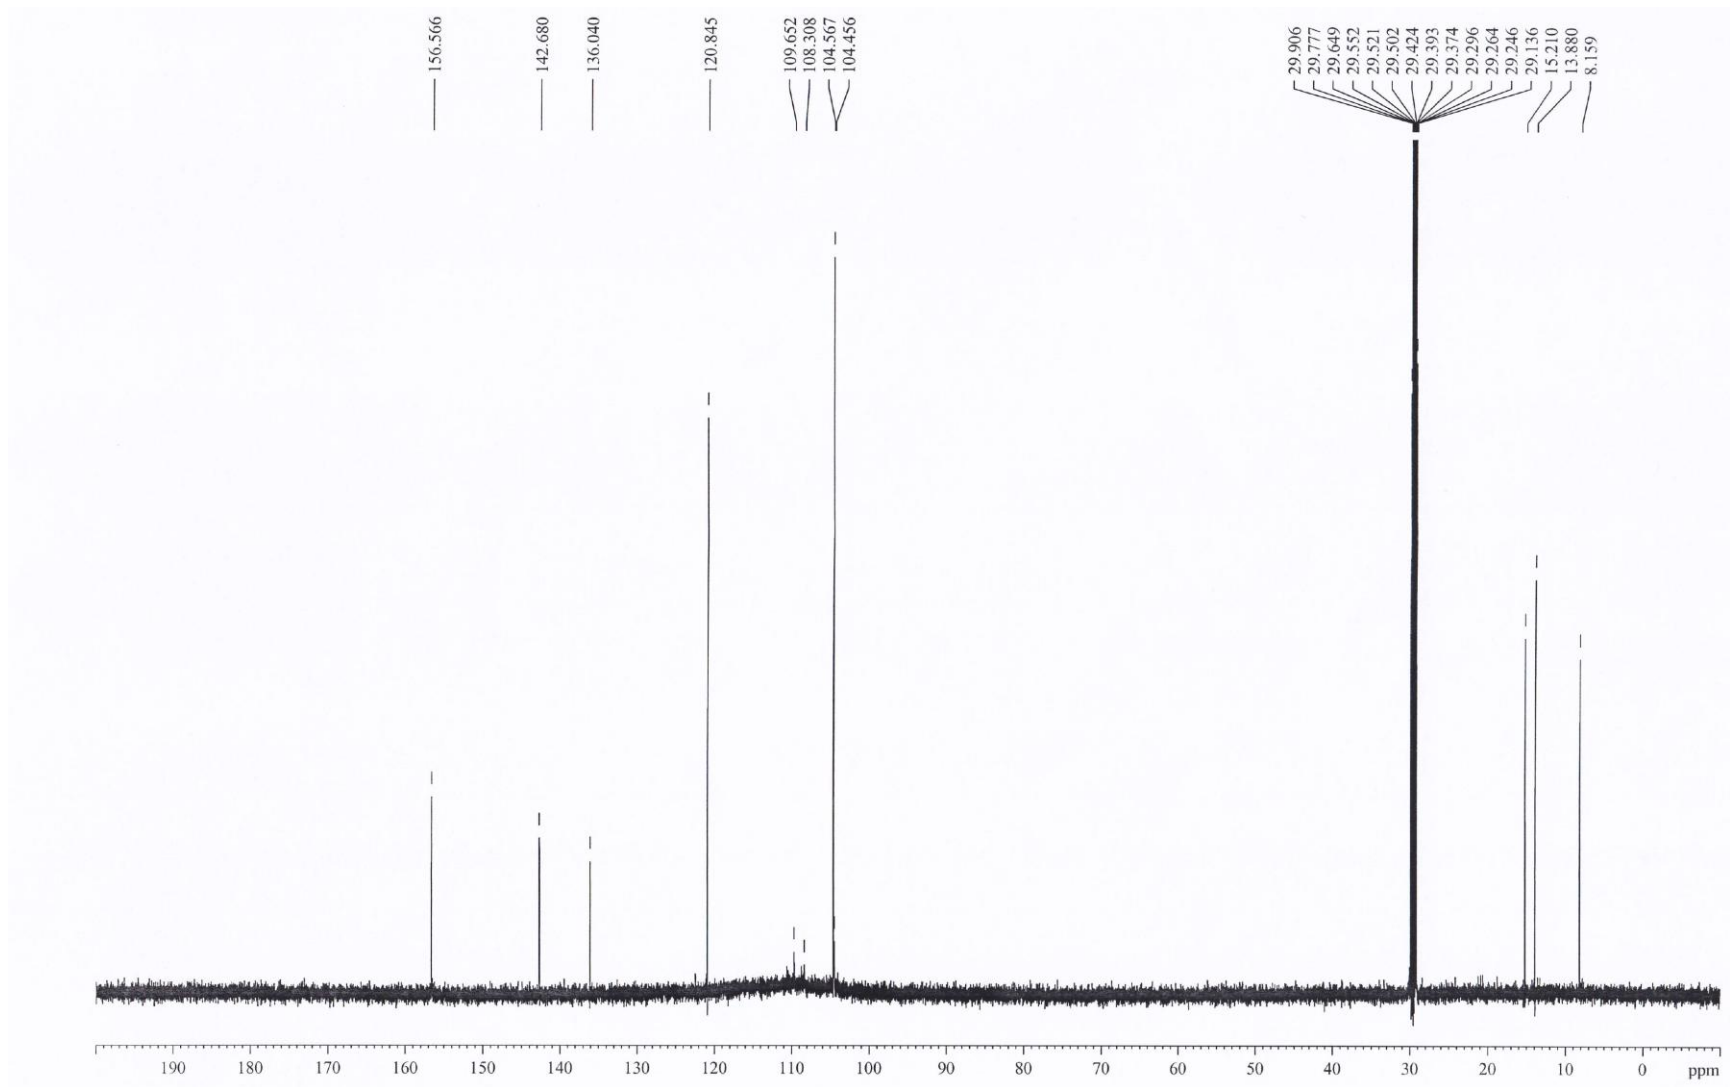

Fig. S9.  $^1\text{H}$  NMR spectrum (acetone- $\text{d}_6$ ) of aspergillusphenol B (**5**)

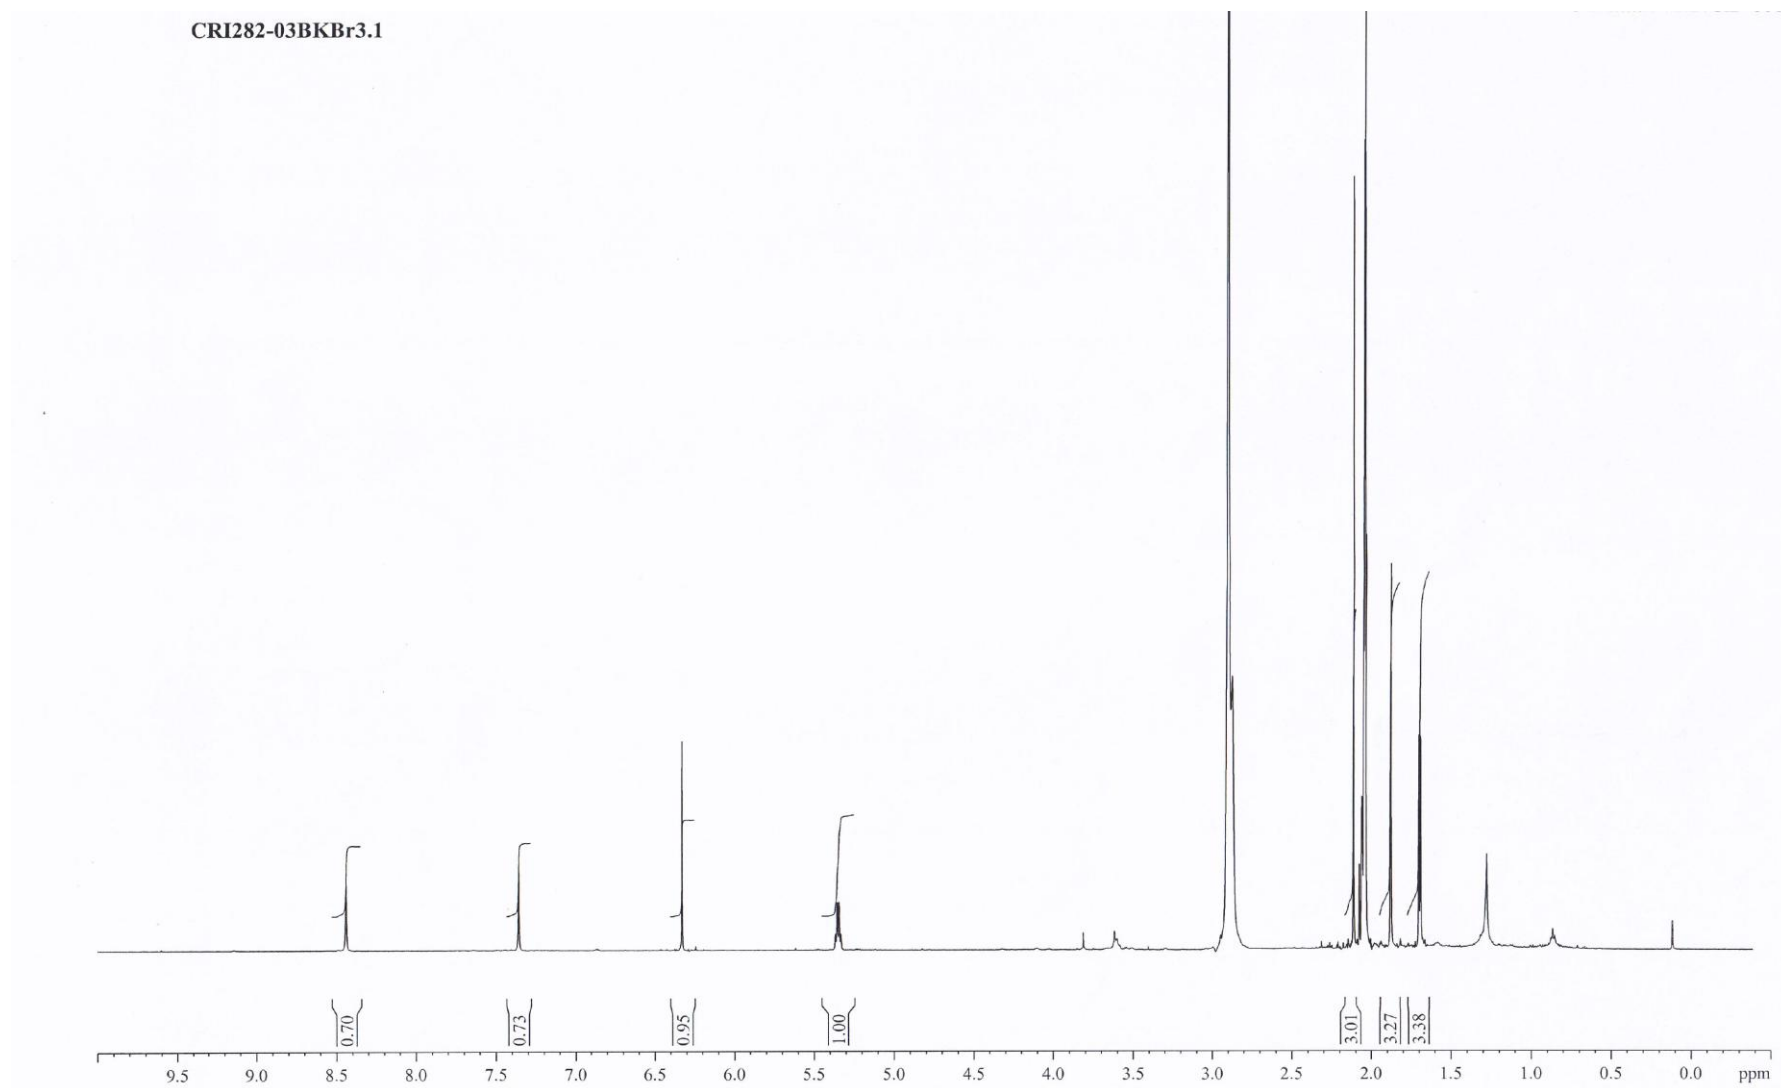

Fig. S10.  $^{13}\text{C}$  NMR spectrum (acetone- $\text{d}_6$ ) of aspergillusphenol B (**5**)

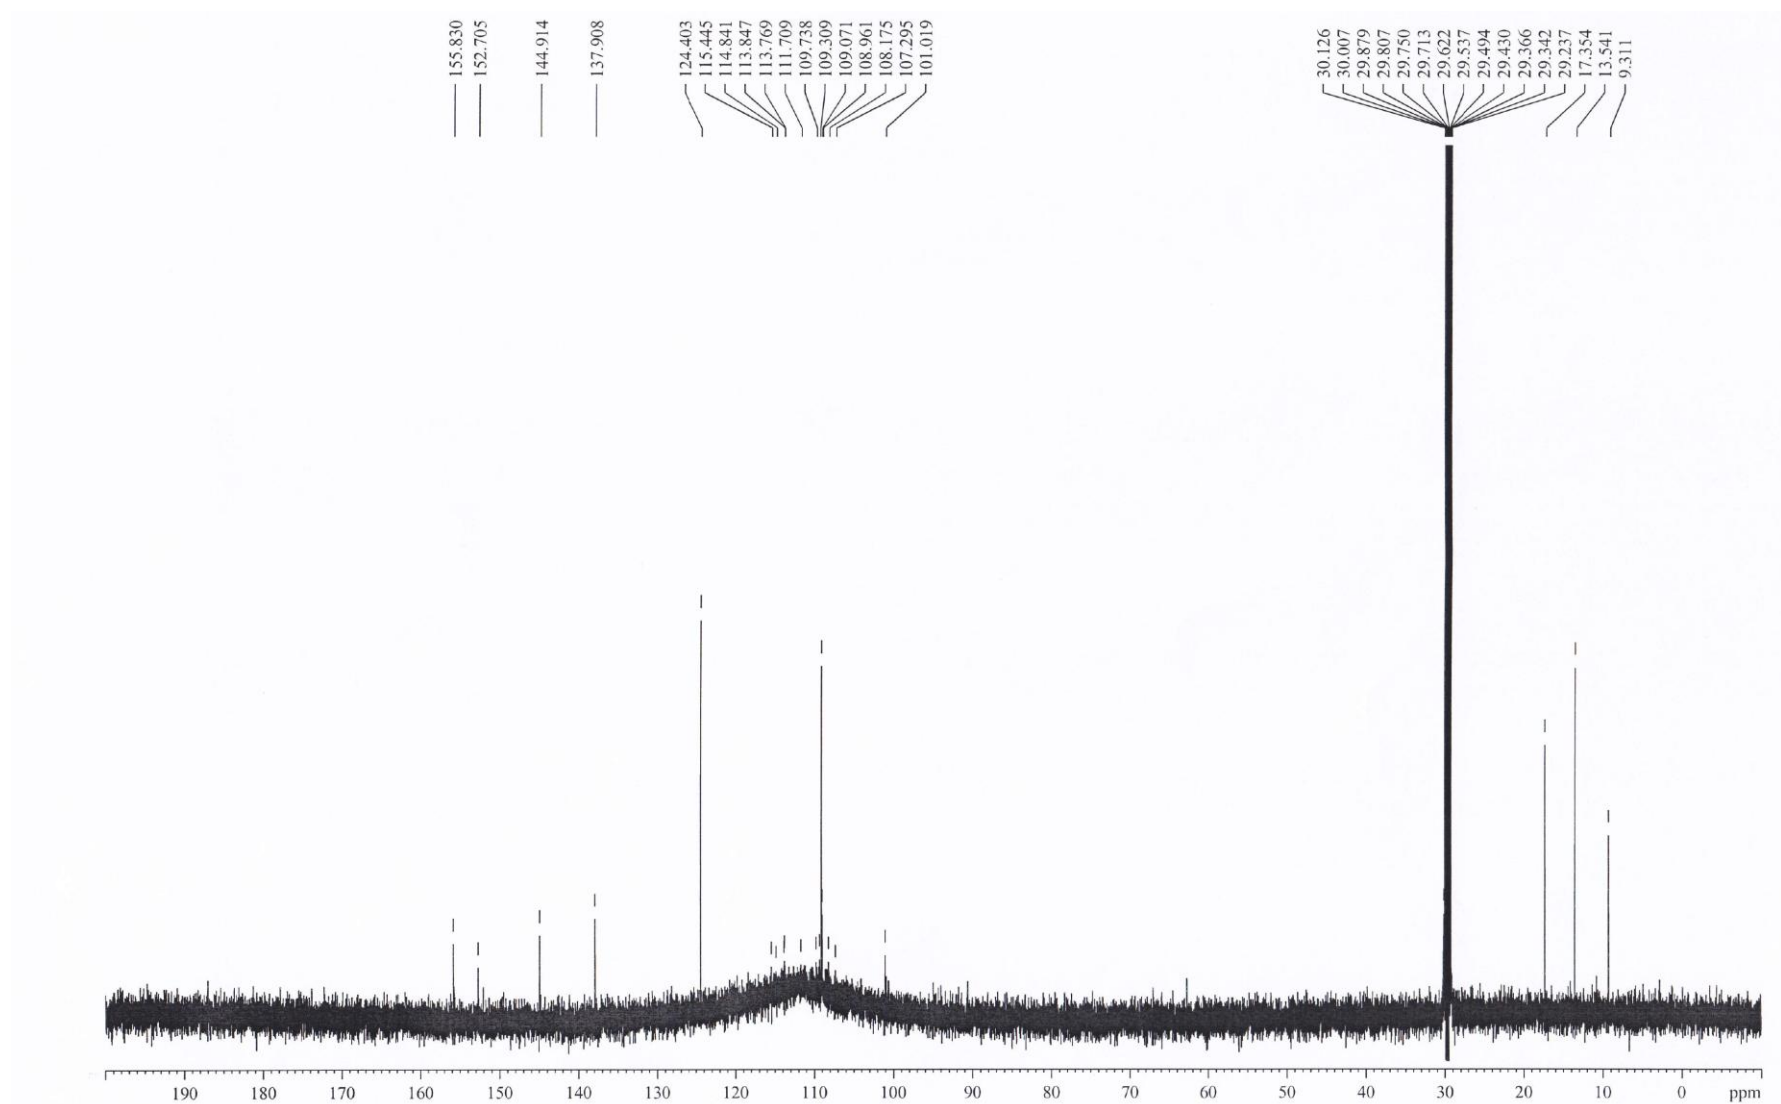

Fig. S11. <sup>1</sup>H NMR spectrum (acetone-d<sub>6</sub>) of 2,4-dichlorounguinol (**9**)

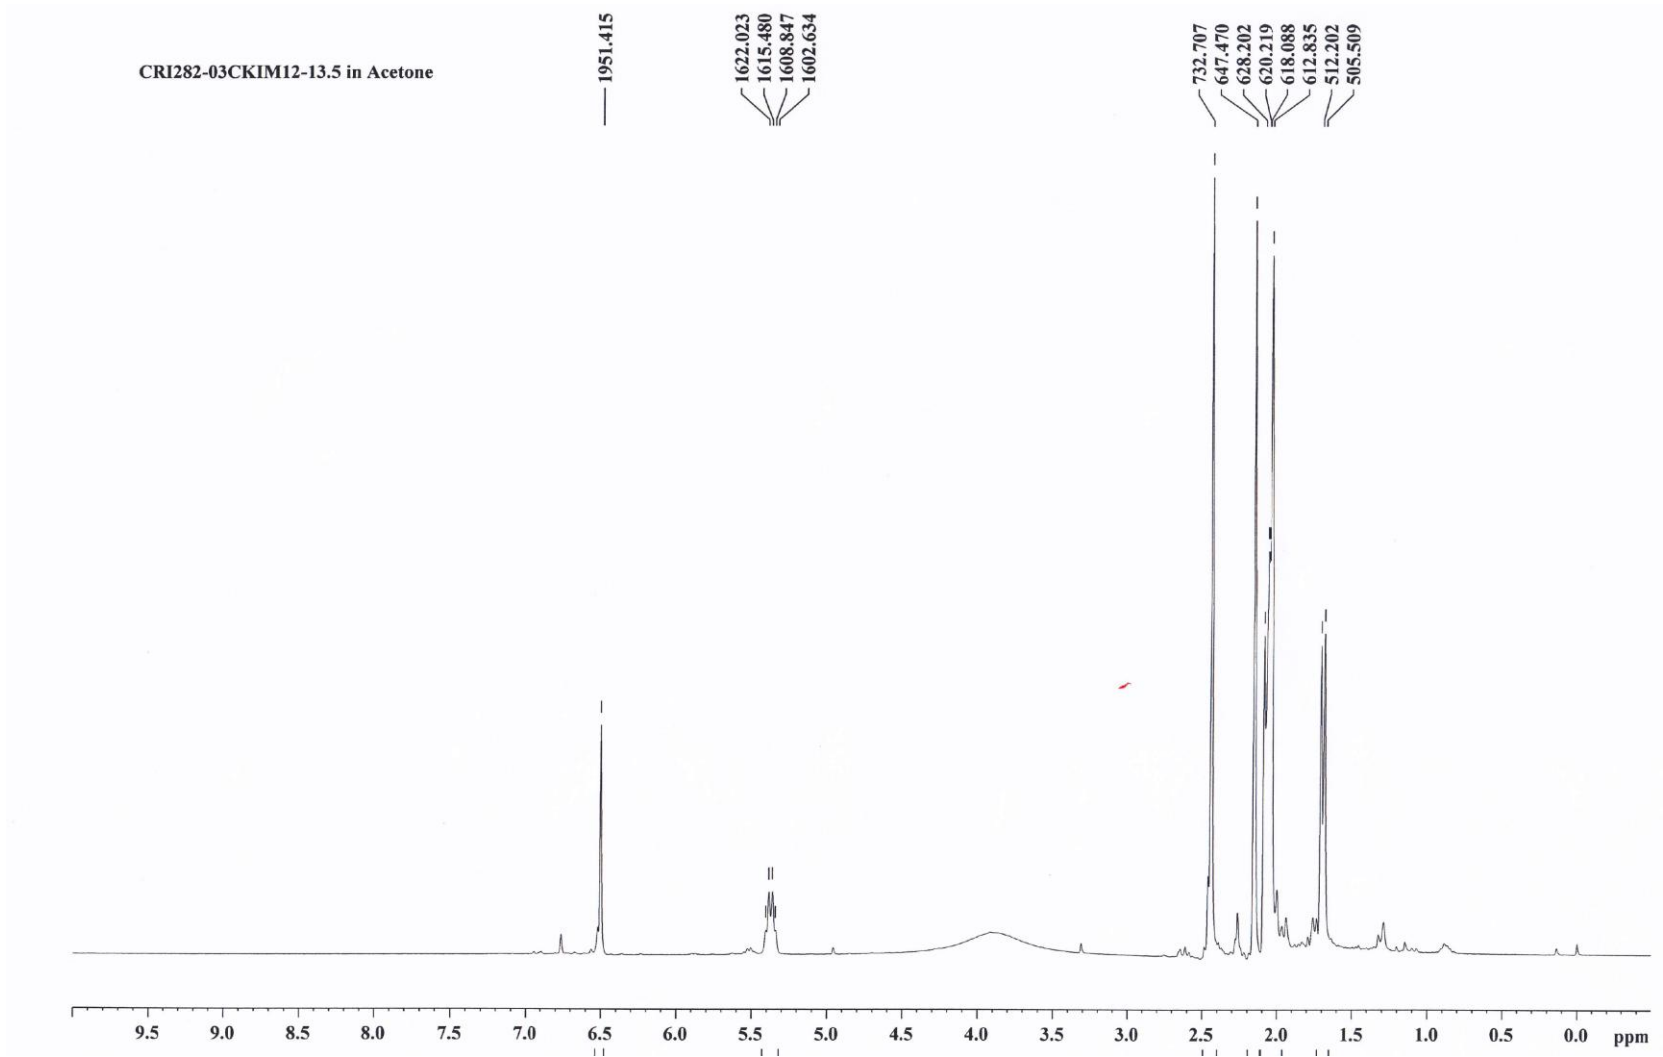

Fig. S12.  $^{13}\text{C}$  NMR spectrum (acetone- $\text{d}_6$ ) of 2,4-dichlorounguinol (**9**)

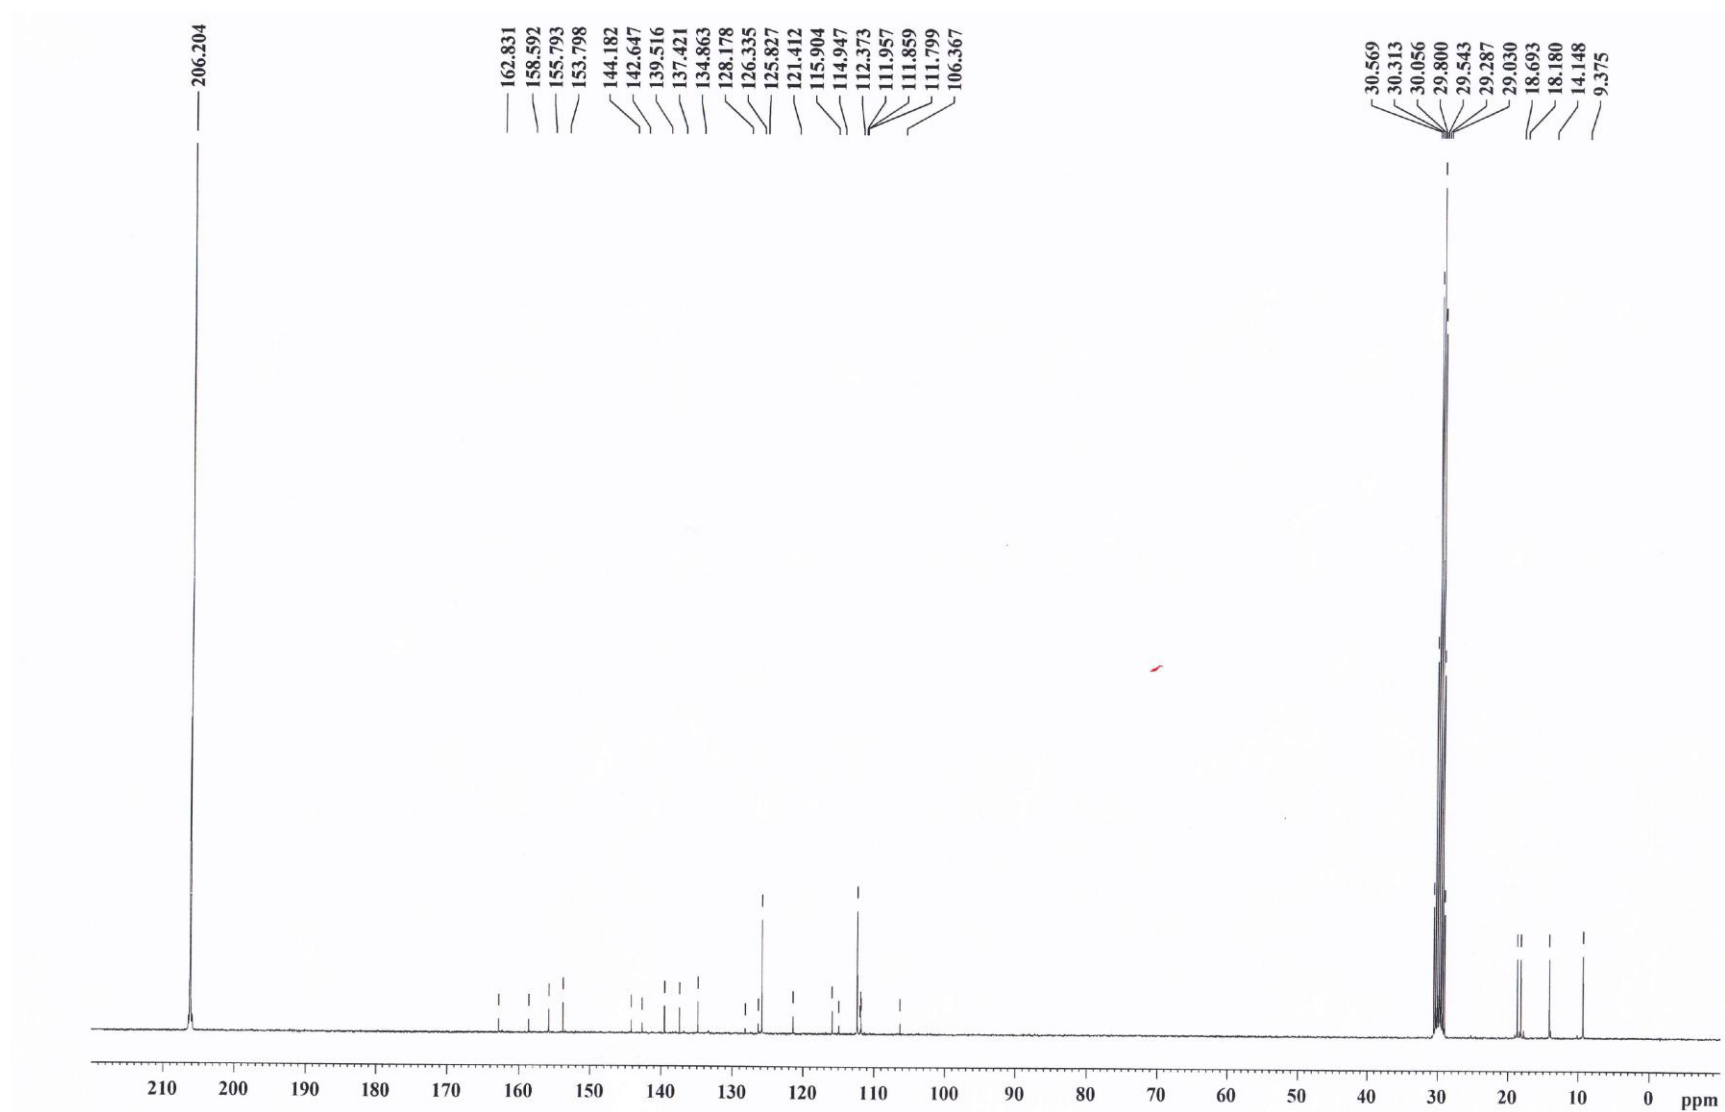

Supplement: c2ra23021f.pdf [file c2ra23021f.pdf]
